# Supplementary material for: Comprehensive analysis of the oncogenic and immunological role of FAP and identification of the ceRNA network in human cancers
Source: publisher site journal article supplement (doi:10.18632/aging.204707), 2023-05-09
Supplement: Supplementary file [file aging-v15i9-204707-supplementary-material-SD1.pdf]

SUPPLEMENTARY FIGURE

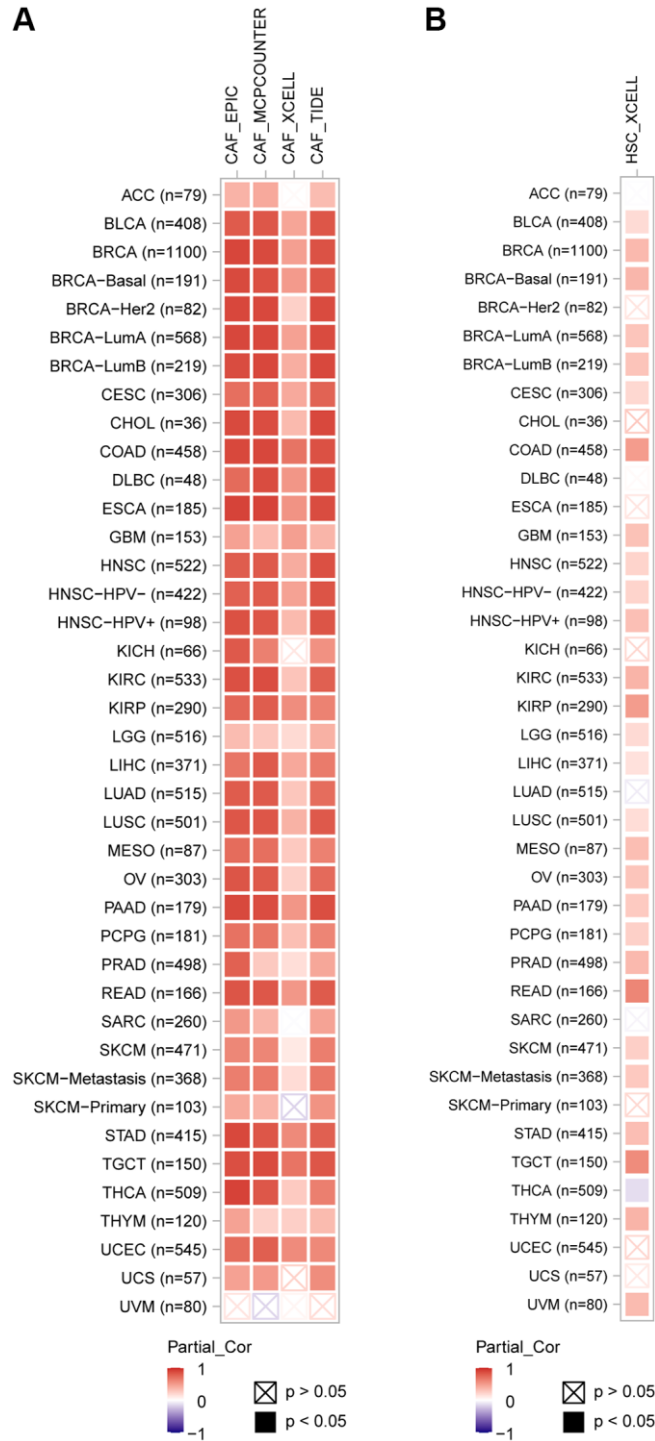

**Supplementary Figure 1.** Different algorithms showed positively correlation between *FAP* expression and (A) Cancer-Associated Fibroblast infiltration and (B) hematopoietic stem cells in TCGA datasets.
